# Supplementary material for: Barriers and solutions to online learning in medical education – an integrative review
Source: PubMed Central journal article supplement (PMC5992716; doi:10.1186/s12909-018-1240-0), 2018-06-07
Supplement: 12909_2018_1240_MOESM1_ESM.pdf [file 12909_2018_1240_MOESM1_ESM.pdf]

## **Additional file 1: Search Strategy**

1. (online learning OR virtual learning OR web-based learning OR blended learning OR internet-based learning OR distance teaching) AND (medical educat\* OR medical faculty) AND (development OR delivery OR implementation OR integration) AND (barriers OR obstacles) AND solutions AND digital literacy
