# Supplementary material for: Barriers and solutions to online learning in medical education – an integrative review
Source: PubMed Central journal article supplement (PMC5992716; doi:10.1186/s12909-018-1240-0), 2018-06-07
Supplement: 12909_2018_1240_MOESM2_ESM.pdf [file 12909_2018_1240_MOESM2_ESM.pdf]

**Additional file 2: Database / Grey Literature Searches**

| <b>Database / Grey Literature</b>                  | <b>Number of results</b> |
|----------------------------------------------------|--------------------------|
| Science Direct                                     | 200                      |
| Scopus                                             | 29                       |
| BioMedical Central                                 | 23                       |
| PubMed                                             | 219                      |
| Ebsco (Academic Search Complete)                   | 17                       |
| ERIC                                               | 11                       |
| Google Scholar                                     | 1,828                    |
| All Aboard Reference List                          | 184                      |
| ProQuest Theses & Dissertations: UK & Ireland      | 57                       |
| ProQuest Theses & Dissertations: A & I             | 127                      |
| University of Limerick Institutional Repository    | 406                      |
| University College Dublin Institutional Repository | 0                        |
| <b>Total</b>                                       | <b>3,101</b>             |
